# Supplementary material
Source: publisher site journal article supplement (https://www.dovepress.com/article/supplementary_file/572919/572919%20Supplementary%20Table%201.docx)
Supplement: Supplementary file 1 [file 572919%20Supplementary%20Table%201.docx]

**Supplementary Table 1. List of antibodies used in this study**

| Antibody | Host species | Dilution | Company | Product Nr |
| --- | --- | --- | --- | --- |
| Primary antibodies  For WB  GAPDH  ERK  p-ERK  AMPK  p-AMPK  BCL2  BAX  Casepase3  Casepase7  Casepase9  β-actin  HO-1  GPX4  NRF2  For IHC  GPX4  Secondary antibodies  Goat Anti-Rabbit IgG  Goat Anti-Mouse IgG  Marker | Rabbit  Rabbit  Rabbit  Rabbit  Rabbit  Mouse  Rabbit  Rabbit  Rabbit  Rabbit  Rabbit  Rabbit  Rabbit  Rabbit  Rabbit | 1：4000  1：4000  1：4000  1：4000  1：4000  1：4000  1：4000  1：4000  1：4000  1：4000  1：4000  1：1000  1：1000  1：2000  1：1600  1:5000  1:5000 | Cell Signaling Technology USA  Cell Signaling Technology USA  Cell Signaling Technology USA  Cell Signaling Technology USA  Cell Signaling Technology USA  Cell Signaling Technology USA  Cell Signaling Technology USA  Cell Signaling Technology USA  Cell Signaling Technology USA  Abcam  Cell Signaling Technology USA  Cell Signaling Technology USA  Cell Signaling Technology USA  Proteintech  Cell Signaling Technology USA  ABclonal  ABclonal  Biosharp | 2118S  9102S  4370S  2532S  2535S  15071S  2772S  9662S  9492S  ab202068  4970S  5853S  59735S  16396-1-AP  59735S  AS014  AS003  BL712C |
